# Supplementary material for: Novel Program Scheme of Vertical NAND Flash Memory for Reduction of Z-Interference
Source: Micromachines (Basel). 2021 May 20;12(5):584. doi: 10.3390/mi12050584 (PMC8160891; doi:10.3390/mi12050584)
Supplement: Supplementary file 1 [file micromachines-12-00584-s001.zip › micromachines-1203753-supplementary.pdf]

# Supplementary Materials

## Novel Program Scheme of Vertical NAND Flash Memory for Reduction of Z-Interference

Su-in Yi, and Jungsik Kim

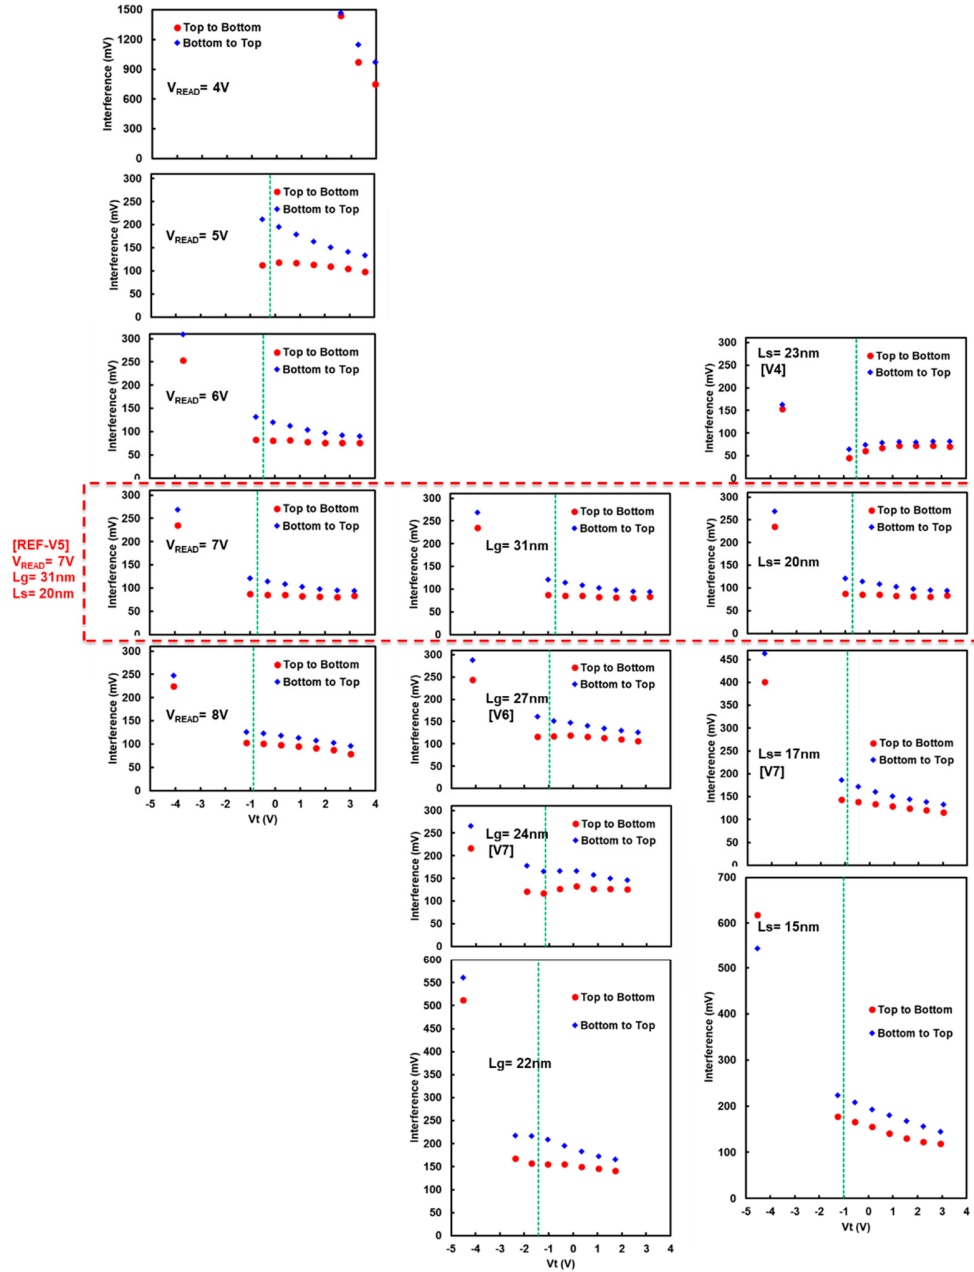

**Figure S1.** Raw data of interference under various conditions of  $V_{\text{READ}}$ ,  $L_g$ , and  $L_s$  with respect to the reference  $V_{\text{READ}}=7\text{ V}$ ,  $L_g=31\text{ nm}$ , and  $L_s=20\text{ nm}$  shown in Figure 5.
